# Supplementary material for: Seasonality Affects Low-Molecular-Weight Organic Acids and Phenolic Compounds’ Composition in Scots Pine Litterfall
Source: MDPI journal article supplement (doi:10.3390/plants13101293), 2024-05-08
Supplement: s1 [file s1]

# Seasonality Affects Low-Molecular-Weight Organic Acids and Phenolic Compounds' Composition in Scots Pine Litterfall

Anna Ilek <sup>1,\*</sup>, Monika Gąsecka <sup>2</sup>, Zuzanna Magdziak <sup>2</sup>, Costas Saitanis <sup>3</sup>, and Courtney M. Siegert <sup>4</sup>

<sup>1</sup> Department of Botany and Forest Habitats, Faculty of Forestry and Wood Technology, Poznań University of Life Sciences, Wojska Polskiego 71F, 60-625, Poznań, Poland; anna.ilek@up.poznan.pl

<sup>2</sup> Department of Chemistry, Faculty of Forestry and Wood Technology, Poznań University of Life Sciences, Wojska Polskiego 75, 60-625 Poznań, Poland; monika.gasecka@up.poznan.pl, zuzanna.magdziak@up.poznan.pl

<sup>3</sup> Laboratory of Ecology and Environmental Sciences, Agricultural University of Athens Iera Odos 75, Votanikos, 11855, Athens, Greece; saitanis@aua.gr

<sup>4</sup> Department of Forestry, Forest and Wildlife Research Center, Mississippi State University, 775 Stone Boulevard, Mississippi State, MS 39762, USA; courtney.siegert@msstate.edu

\* Correspondence: anna.ilek@up.poznan.pl

## Supplemental Information

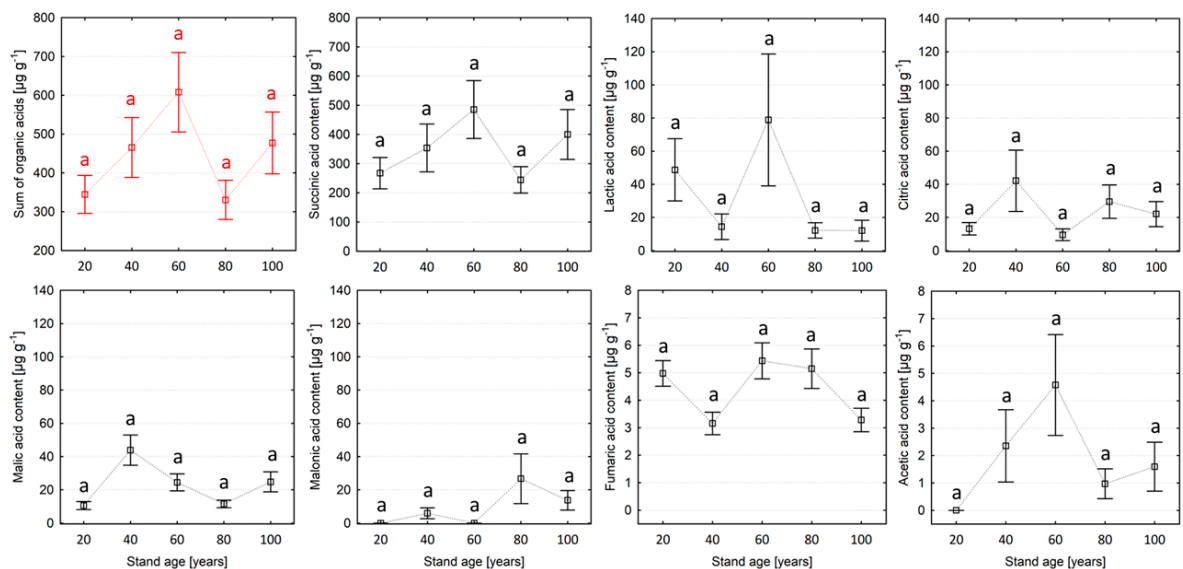

**Figure S1.** Organic acid content in *P. sylvestris* needles as a function of stand age (mean  $\pm$  SE). Significant differences ( $p < 0.05$ ) between stand ages as computed from non-parametric Kruskal-Wallis test are denoted with different lowercase letters.

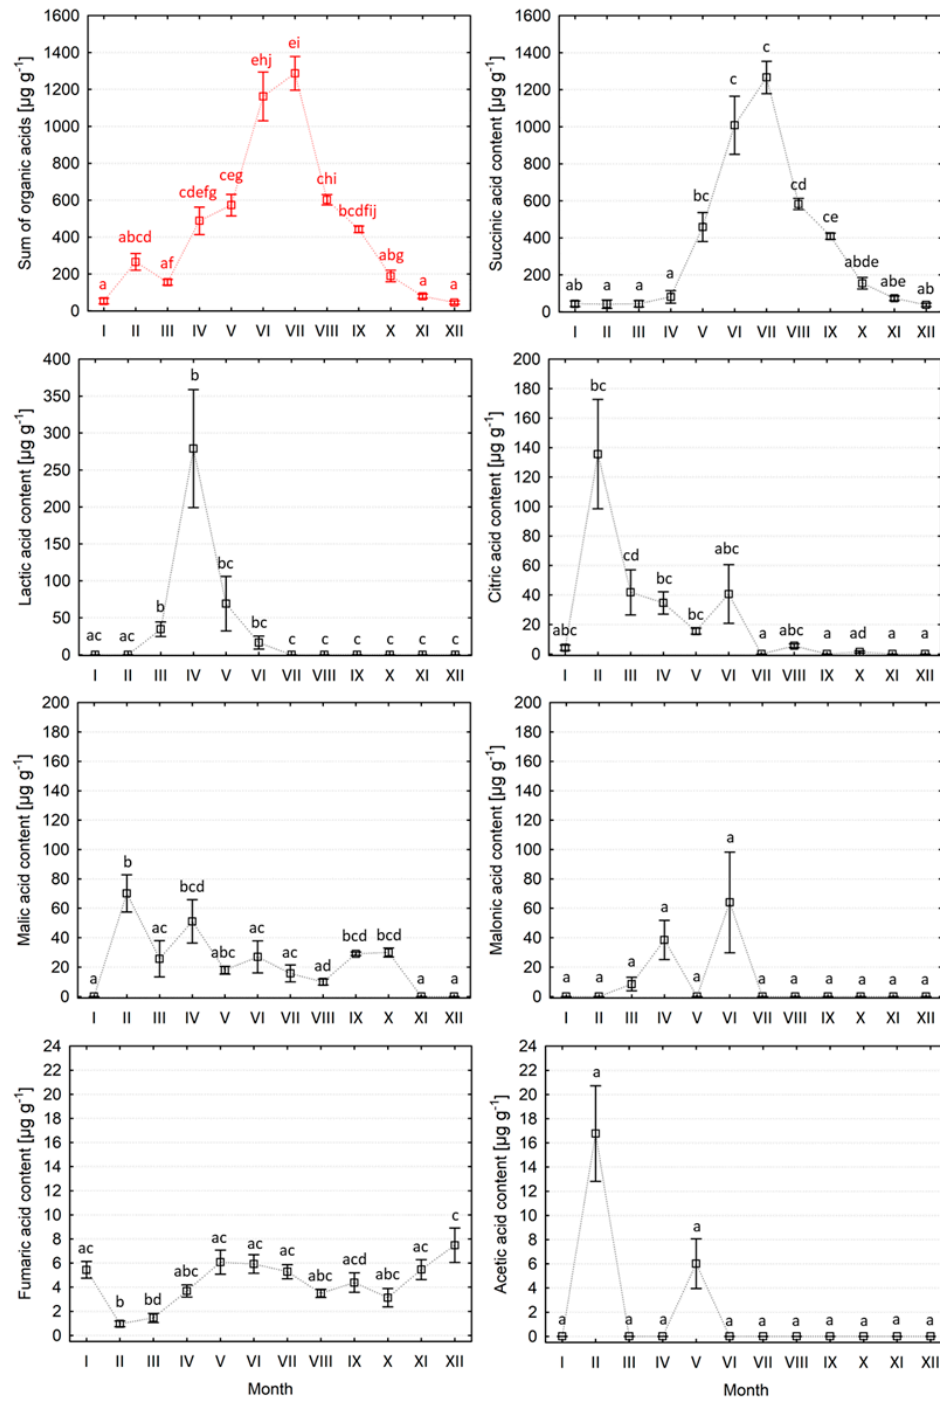

**Figure S2.** Organic acid content in *P. sylvestris* needles as a function of sampling month (mean  $\pm$  SE). Significant differences ( $p < 0.05$ ) between sampling months as computed from non-parametric Kruskal-Wallis test are denoted with different lowercase letters.
